# Supplementary material
Source: PubMed Central journal article supplement (PMC7017744)
Supplement: ajcr0010-0038-f9.pdf [file ajcr0010-0038-f9.pdf]

# miR-193a-5p targeting SRSF6 promotes pancreatic cancer cell metastasis

**Table S1.** miR-193a-5p expression and clinicopathological features in 40 patients with pancreatic ductal carcinoma (PADC)

| Characteristics           | Expression of miR-193a-5p |      | p value* |
|---------------------------|---------------------------|------|----------|
|                           | low                       | high |          |
| Sex                       |                           |      | 0.076    |
| male                      | 17                        | 12   |          |
| female                    | 3                         | 8    |          |
| Age                       |                           |      | 0.705    |
| ≤60                       | 15                        | 16   |          |
| >60                       | 5                         | 4    |          |
| Tumor Differentiation     |                           |      | 0.569    |
| Well-differentiated       | 7                         | 4    |          |
| Moderately differentiated | 9                         | 11   |          |
| Poorly differentiated     | 4                         | 5    |          |
| T Classification          |                           |      | 0.584    |
| T1                        | 2                         | 3    |          |
| T2                        | 8                         | 5    |          |
| T3                        | 10                        | 12   |          |
| N Classification          |                           |      | 0.009*   |
| N0                        | 12                        | 4    |          |
| N1                        | 8                         | 16   |          |
| TNM stage                 |                           |      | 0.038*   |
| I/II                      | 9                         | 3    |          |
| III/IV                    | 11                        | 17   |          |

Median expression level was used as a cutoff to divide the 40 patients into miR-193a-5p low group (n = 20) and miR-193a-5p high group (n = 20). Two-sided  $\chi^2$  test. \*P < 0.05.

**Table S2.** Sequences of mimics, inhibitors and siRNAs, and of primers used for qRT-PCR, AS validation, RT-PCR and plasmid construction

| RNA/Primer names                      | Sequences                                                                        |
|---------------------------------------|----------------------------------------------------------------------------------|
| pre-miR-193a-5p                       | 5'-UGGGUCUUUGCGGGCGAGAUGA-3' (sense)<br>5'-AUCUCGCCCCGAAAGACCCAUU-3' (antisense) |
| pre-miR-NC                            | 5'-UUCUCCGAACGUGUCACGUTT-3' (sense)<br>5'-ACGUGACACGUUCGGAGAATT-3' (antisense)   |
| anti-miR-193a-3p                      | 5'-UCAUCUCGCCCCGAAAGACCCA-3'                                                     |
| anti-miR-NC                           | 5'-CAGUACUUUUGUGUAGUACAA-3'                                                      |
| SRSF6-siRNA-1                         | 5'-GGAUACAGCAGUCGGAGAATT-3' (sense)<br>5'-UUCUCCGACUGCUGUAUCCTT-3' (antisense)   |
| SRSF6-siRNA-2                         | 5'-GCAGUUGGCAAGAUUUAATT-3' (sense)<br>5'-UUUAAAUCUUGCCAACUGCTT-3' (antisense)    |
| SRSF6-siRNA-3                         | 5'-GCAGGAAAUCUAGAUCAAATT-3' (sense)<br>5'-UUUGAUCUAGAUUUCUGCTT-3' (antisense)    |
| OGDHL ex3+ si-1                       | 5'-GGACAGCUUCUUCAGGAATT-3' (sense)<br>5'-UUCUCCUGAAGAAGCUGUCCTT-3' (antisense)   |
| OGDHL ex3+ si-2                       | 5'-GGACCAAGACCAGCAAUUTT-3' (sense)<br>5'-AAUUUGCUGGUCUUGGUCCTT-3' (antisense)    |
| Sequences of primers used for qRT-PCR |                                                                                  |
| hsa-miR-193a-5p forward               | 5'-ACGCTGGGTCCTTGCGG-3'                                                          |
| hsa-miR-193a-5p reverse               | 5'-TATGTTGTTCCAGACTCCTTCAC-3'                                                    |
| U6 forward                            | 5'-ATTGGAACGATACAGAGAAGATT-3'                                                    |
| U6 reverse                            | 5'-GGAACGCTTCACGAATTG-3'                                                         |

## miR-193a-5p targeting SRSF6 promotes pancreatic cancer cell metastasis

|                                                    |                                                                   |
|----------------------------------------------------|-------------------------------------------------------------------|
| SRSF6 forward                                      | 5'-ACATAGGACGCCTGAGCTACA-3'                                       |
| SRSF6 reverse                                      | 5'-GCCGTACCCATTTTGGAGGTCTA-3'                                     |
| GAPDH forward                                      | 5'-GAGTCAACGGATTGGTCTG-3'                                         |
| GAPDH reverse                                      | 5'-TTGATTTGGAGGGATCTCG-3'                                         |
| Sequences of primers used for AS validation        |                                                                   |
| pGint-OGDHL ex3+ forward                           | 5'-TGTTGGAAAACCCCCAGAG-3'                                         |
| pGint-OGDHL ex3+ reverse                           | 5'-GAGGGCACAAAGGAGTCCAG-3'                                        |
| pGint-ECM1 ex4- forward                            | 5'-ACCCTGACTCCTCTCAGCAT-3'                                        |
| pGint-ECM1 ex4- reverse                            | 5'-TTGGGCAGGTAGCAGCTTTT-3'                                        |
| Sequences of primers used for RT-PCR               |                                                                   |
| OGDHL forward                                      | 5'-CATCGACAAATCCAGCGAGAT-3'                                       |
| OGDHL reverse                                      | 5'-ATCCTCTCATGGTACATGCC-3'                                        |
| ECM1 forward                                       | 5'-GACAGAGTCAAGTGACGCC-3'                                         |
| ECM1 reverse                                       | 5'-CTTCTGTTTCATTGGGGTGCTG-3'                                      |
| Sequences of primers used for plasmid construction |                                                                   |
| pcDNA3.1-SRSF6 forward                             | 5'-CTAGCTAGCGCCACCATGCCGCGCTCTACATAG-3'                           |
| pcDNA3.1-SRSF6 reverse                             | 5'-CCGGAATTCTTAATCTCTGGAACTCGACCTGG-3'                            |
| pcDNA3.1-ECM1 forward                              | 5'-CTAGCTAGCGCCACCATGGGGACCACAGCCAGAGC-3'                         |
| pcDNA3.1-ECM1 reverse                              | 5'-CCGGAATTCTCATTCTTCTTGGGCTCAG-3'                                |
| SRSF6-WT forward                                   | 5'-TCGAGGGCTCTAAGGAAATGGTGGCATGAAGACCTCTCCCTTCTTTGTAGAATTAAGT-3'  |
| SRSF6-WT reverse                                   | 5'-CTAGACTTAATTCTACAAAGAAGGGAGAGGGTCTTCATGCCACCATTTCTTAGAGCCC-3'  |
| SRSF6-MUT forward                                  | 5'-TCGAGGGCTCTAAGGAAATGGTGGCATGCCTCAAATCTCCCTTCTTTGTAGAATTAAGT-3' |
| SRSF6-MUT reverse                                  | 5'-CTAGACTTAATTCTACAAAGAAGGGAGATTGAGGCATGCCACCATTTCTTAGAGCCC-3'   |

**Table S3.** Antibodies used for western blotting (WB), RNA-binding protein immunoprecipitation (RIP)

| Protein    | Applications | Antibody                          | Origin | dilution     | Molecular weight |
|------------|--------------|-----------------------------------|--------|--------------|------------------|
| GAPDH      | WB           | D16H11, Cell Signaling Technology | Rabbit | 1:1000       | 36 KD            |
| E-cadherin | WB           | 3195, Cell Signaling Technology   | Rabbit | 1:1000       | 135 KD           |
| ZEB-1      | WB           | 3396, Cell Signaling Technology   | Rabbit | 1:1000       | 200 KD           |
| MMP-9      | WB           | 3852, Cell Signaling Technology   | Rabbit | 1:1000       | 92 KD            |
| MMP-2      | WB           | 4022, Cell Signaling Technology   | Rabbit | 1:1000       | 72 KD            |
| Snail      | WB           | 3879, Cell Signaling Technology   | Rabbit | 1:1000       | 29 KD            |
| Vimentin   | WB           | ab92547, Abcam                    | Rabbit | 1:1000       | 57 KD            |
| Ago2       | RIP          | 03-110, Merck Millipore           | Mouse  | 1:10         | 100 KD           |
| IgG        | RIP          | ab18413, Abcam                    | Mouse  | 1:10         | 150 kD           |
| SRSF6      | WB, IHC      | ab140623, Abcam                   | Rabbit | 1:1000, 1:50 | 40 KD            |
| OGDHL      | WB, IHC      | 17110-1-AP, Proteintech           | Rabbit | 1:1000, 1:50 | 115 KD           |
| ECM1       | WB, IHC      | 11521-1-AP, Proteintech           | Rabbit | 1:1000, 1:50 | 61 KD            |

**Table S4.** Screening of 93 predicted targets of miR-193a-5p

| No. | Name      | Cancer Related | Reported in Pancreatic Cancer | Expression in pancreatic tumor | Good survival related | P-Value | Migration and invasion related | Reported miR-193a-5p target | $\Delta G$ (kcal/mol) |
|-----|-----------|----------------|-------------------------------|--------------------------------|-----------------------|---------|--------------------------------|-----------------------------|-----------------------|
| 1   | SRSF6     | √              | ×                             | Lower                          | √                     | 0.0015  | √                              | ×                           | -22.6                 |
| 2   | KIAA0100  | √              | ×                             | Lower                          | √                     | 0.037   | √                              | ×                           | -22.6                 |
| 3   | USP6      | √              | ×                             | Lower                          | √                     | 0.00078 | √                              | ×                           | -23.8                 |
| 4   | CNTFR     | √              | ×                             | Lower                          | √                     | 0.0051  | ×                              |                             |                       |
| 5   | KIAA0895L | √              | ×                             | Lower                          | √                     | 0.00024 | ×                              |                             |                       |
| 6   | PIP4K2B   | √              | ×                             | Lower                          | √                     | 0.0038  | ×                              |                             |                       |
| 7   | MBD6      | √              | ×                             | Lower                          | √                     | 0.018   | ×                              |                             |                       |

miR-193a-5p targeting SRSF6 promotes pancreatic cancer cell metastasis

|    |          |   |   |        |   |       |   |
|----|----------|---|---|--------|---|-------|---|
| 8  | PCDHA13  | √ | × | Lower  | √ | 0.025 | × |
| 9  | PRPS1    | √ | × | Lower  | √ | 0.031 | × |
| 10 | ZNF70    | √ | × | Lower  | √ | 0.033 | × |
| 11 | FADS1    | √ | × | Lower  | × |       |   |
| 12 | BMF      | √ | × | Lower  | × |       |   |
| 13 | SMARCD1  | √ | × | Lower  | × |       |   |
| 14 | MLLT10   | √ | × | Lower  | × |       |   |
| 15 | CHERP    | √ | × | Lower  | × |       |   |
| 16 | EBF3     | √ | × | Lower  | × |       |   |
| 17 | GATAD2B  | √ | × | Lower  | × |       |   |
| 18 | ANKS1A   | √ | × | Lower  | × |       |   |
| 19 | RBBP6    | √ | × | Lower  | × |       |   |
| 20 | HECTD3   | √ | × | Lower  | × |       |   |
| 21 | FBXL3    | √ | × | Lower  | × |       |   |
| 22 | FANCD2   | √ | × | Lower  | × |       |   |
| 23 | PHACTR4  | √ | × | Lower  | × |       |   |
| 24 | EEF1A1   | √ | × | Lower  | × |       |   |
| 25 | MYO9B    | √ | × | Lower  | × |       |   |
| 26 | TCF3     | √ | × | Lower  | × |       |   |
| 27 | ADAMTS2  | √ | × | Lower  | × |       |   |
| 28 | PCDHA5   | √ | × | Higher |   |       |   |
| 29 | PCDHA7   | √ | × | Higher |   |       |   |
| 30 | PCDHA8   | √ | × | Higher |   |       |   |
| 31 | PCDHA2   | √ | × | Higher |   |       |   |
| 32 | PCDHA4   | √ | × | Higher |   |       |   |
| 33 | PCDHA1   | √ | × | Higher |   |       |   |
| 34 | PCDHAC2  | √ | × | Higher |   |       |   |
| 35 | GANAB    | √ | × | Higher |   |       |   |
| 36 | UBE2D2   | √ | × | Higher |   |       |   |
| 37 | CEP57    | √ | × | Higher |   |       |   |
| 38 | CRYBG3   | √ | × | Higher |   |       |   |
| 39 | TSC22D2  | √ | × | Higher |   |       |   |
| 40 | DDA1     | √ | × | Higher |   |       |   |
| 41 | GBA2     | √ | × | Higher |   |       |   |
| 42 | EIF4EBP2 | √ | × | Higher |   |       |   |
| 43 | OTUD7B   | √ | × | Higher |   |       |   |
| 44 | GPR39    | √ | × | Higher |   |       |   |
| 45 | MYO1D    | √ | × | Higher |   |       |   |
| 46 | CSNK2A1  | √ | × | Higher |   |       |   |
| 47 | PCDHA11  | √ | √ |        |   |       |   |
| 48 | ACVR1    | √ | √ |        |   |       |   |
| 49 | BTG1     | √ | √ |        |   |       |   |
| 50 | GNAQ     | √ | √ |        |   |       |   |
| 51 | NETO2    | √ | √ |        |   |       |   |
| 52 | RAP2A    | √ | √ |        |   |       |   |
| 53 | SPOCK1   | √ | √ |        |   |       |   |
| 54 | PCDH10   | √ | √ |        |   |       |   |
| 55 | COL1A1   | √ | √ |        |   |       |   |
| 56 | CDK14    | √ | √ |        |   |       |   |
| 57 | MMP16    | √ | √ |        |   |       |   |

## miR-193a-5p targeting SRSF6 promotes pancreatic cancer cell metastasis

|    |          |   |   |
|----|----------|---|---|
| 58 | NUAK1    | √ | √ |
| 59 | VCL      | √ | √ |
| 60 | MEIS1    | √ | √ |
| 61 | AJUBA    | √ | √ |
| 62 | SENP1    | √ | √ |
| 63 | PBX1     | √ | √ |
| 64 | PCDHA12  | x |   |
| 65 | PCDHA6   | x |   |
| 66 | PCDHA10  | x |   |
| 67 | PCDHA9   | x |   |
| 68 | PCDHA3   | x |   |
| 69 | PCDHAC1  | x |   |
| 70 | NLN      | x |   |
| 71 | SLC30A5  | x |   |
| 72 | ITSN1    | x |   |
| 73 | IPPK     | x |   |
| 74 | OLA1     | x |   |
| 75 | ZMYM4    | x |   |
| 76 | WIZ      | x |   |
| 77 | IFFO2    | x |   |
| 78 | ZNF827   | x |   |
| 79 | XK       | x |   |
| 80 | ANGEL1   | x |   |
| 81 | CHST14   | x |   |
| 82 | GOLGA8B  | x |   |
| 83 | GOLGA8A  | x |   |
| 84 | GDE1     | x |   |
| 85 | C18orf25 | x |   |
| 86 | SYT12    | x |   |
| 87 | TMTC3    | x |   |
| 88 | SEC61A1  | x |   |
| 89 | TAOK1    | x |   |
| 90 | SLC7A1   | x |   |
| 91 | NUP210   | x |   |
| 92 | CLPB     | x |   |
| 93 | SLC7A6   | x |   |

---

miR-193a-5p targeting SRSF6 promotes pancreatic cancer cell metastasis

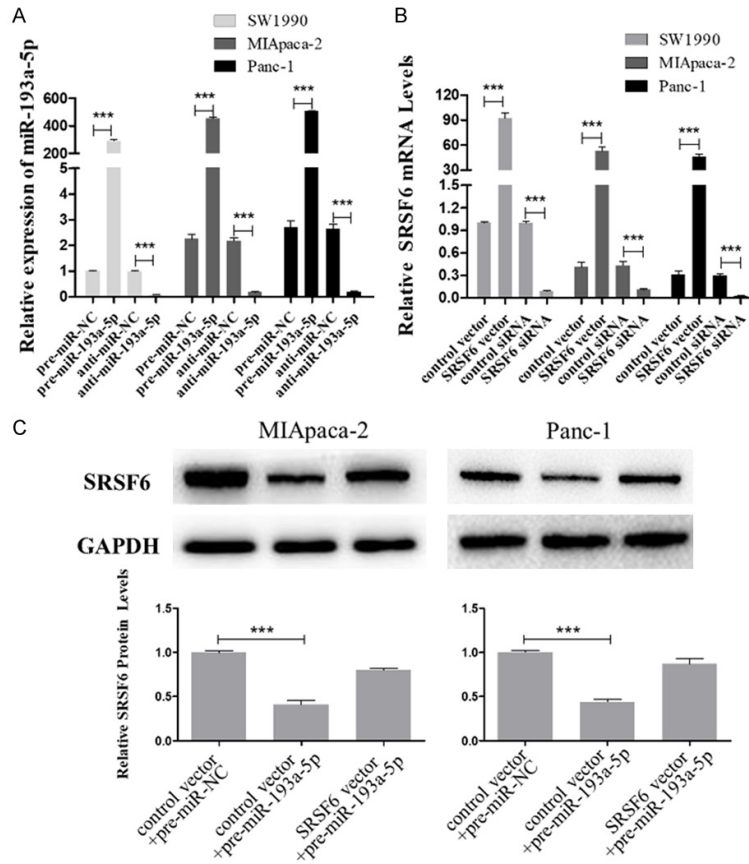

**Figure S1.** Verification of miR-193a-5p, SRSF6 overexpression or knockdown efficiencies in breast cancer cells. A. miR-193a-5p levels in SW1990, MIAPaca-2 and Panc-1 cells transfected with pre-miR-NC, pre-miR-193a-5p, anti-miR-NC, or anti-miR-193a-5p. B. SRSF6 mRNA in SW1990, MIAPaca-2 and Panc-1 cells transfected with control vector, SRSF6 vector, control siRNA or SRSF6 siRNA. C. SRSF6 protein levels in SW1990 and Panc-1 cells transfected with pre-miR-NC plus control vector, pre-miR-193a-5p plus control vector, or pre-miR-193a-5p plus SRSF6 vector. All data are shown as the mean  $\pm$  SEM. \*\*\* $P < 0.001$ .

miR-193a-5p targeting SRSF6 promotes pancreatic cancer cell metastasis

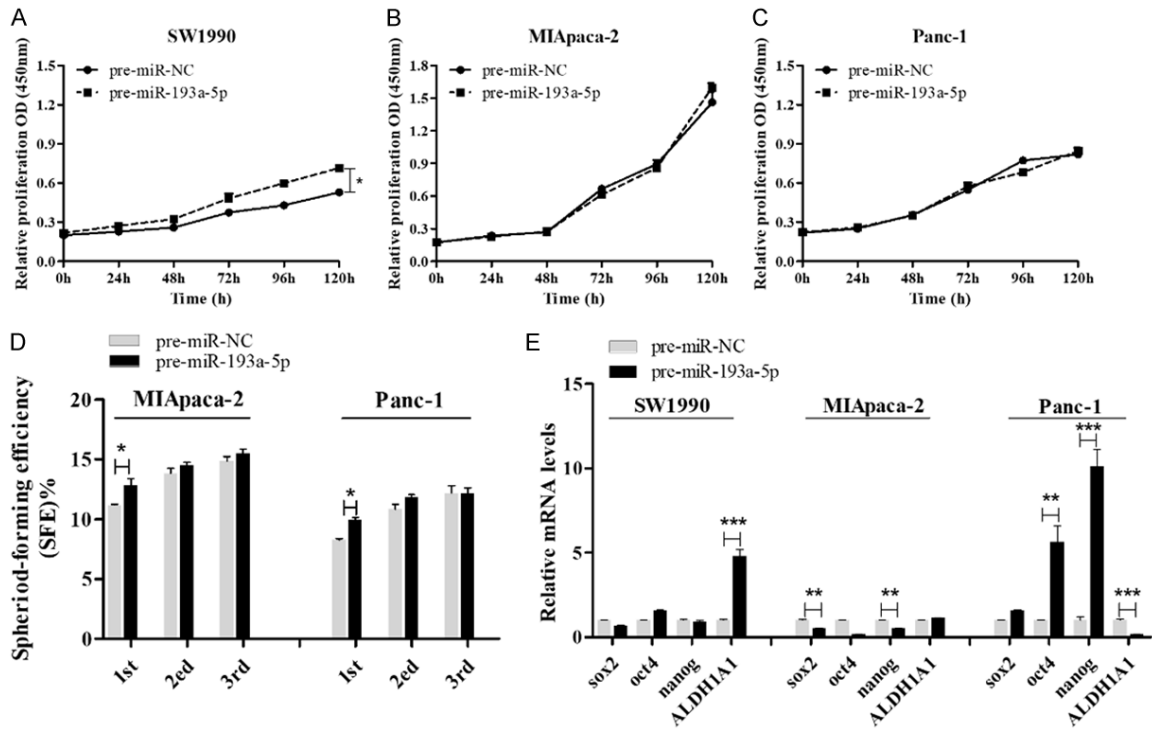

**Figure S2.** miR-193a-5p has no significant effects on pancreatic cancer cell proliferation, self-renewal, or drug resistance ability. (A-C) Proliferative abilities of SW1990 cells (A), MIApaca-2 cells (B) and Panc-1 cells (C) transfected with pre-miR-NC or pre-miR-193a-5p detected by CCK-8 assays. (D) The sphere-formation efficiencies (SFEs) of MIApaca-2 cells and Panc-1 cells transfected with pre-miR-NC or pre-miR-193a-5p. (E) mRNA levels of pluripotent transcription factors in SW1990 cells, MIApaca-2 cells and Panc-1 cells transfected with pre-miR-NC or pre-miR-193a-5p detected by qRT-pancreatic cancerR. All data are shown as the mean  $\pm$  SEM. \* $P < 0.05$ .

miR-193a-5p targeting SRSF6 promotes pancreatic cancer cell metastasis

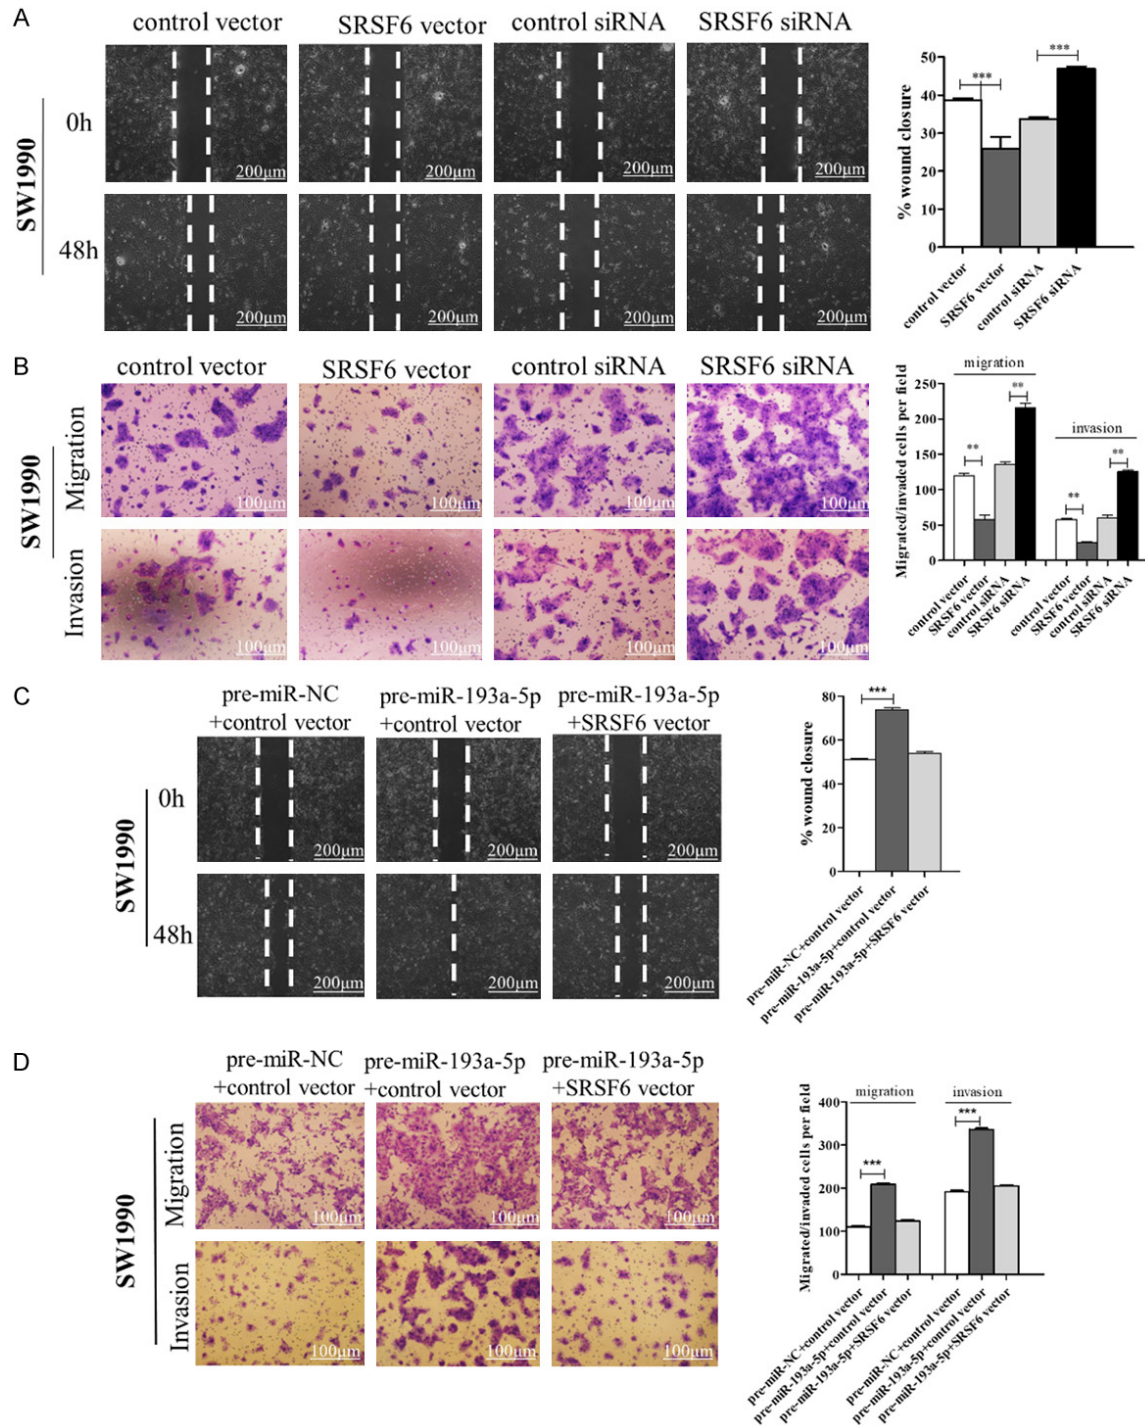

**Figure S3.** miR-193a-5p promotes pancreatic cancer cell migration and invasion via targeting SRSF6 in SW1990 cells. (A, B) Migration and invasion of SW1990 cells transfected with control vector, SRSF6 vector, control siRNA or SRSF6 siRNA detected by wound healing assay (A) or migration and invasion assay (B). Scale bar, 100  $\mu$ m. (C, D) Migration and invasion of SW1990 cells transfected with pre-miR-NC plus control vector, pre-miR-193a-5p plus control vector, or pre-miR-193a-5p plus SRSF6 vector detected by wound healing assay (C) or migration and invasion assay (D). Scale bar, 100  $\mu$ m. All data are shown as the mean  $\pm$  SEM. \*\* $P < 0.01$ ; \*\*\* $P < 0.001$ .
